# Supplementary material for: Comprehensive Detection, Grading, and Growth Behavior Evaluation of Subthreshold and Low Intensity Photocoagulation Lesions by Optical Coherence Tomographic and Infrared Image Analysis
Source: Hindawi journal article supplement (doi:10.1155/2014/492679), 2014-01-01
Supplement: f1 [file 492679.f1.pdf]

## Tables

Suppl. Tbl. shows mean OCT GLD's at all 4 time points examined for different lesion stratifications. The same data are displayed graphically in Fig. 5. 0-values were excluded from the evaluation.

\* In these groups, irradiation diameters were unevenly distributed, which leads to a bias.

| Stratification criterion | 1 hour<br>OCT GLD<br>[μm] | 1 month<br>OCT GLD<br>[μm] | 3 months<br>OCT GLD<br>[μm] | 6 months<br>OCT GLD<br>[μm] |
|--------------------------|---------------------------|----------------------------|-----------------------------|-----------------------------|
|                          |                           |                            |                             |                             |
| Diameter 100 μm          | 243                       | 196                        | 178                         | 193                         |
| Diameter 300 μm          | 404                       | 307                        | 303                         | 307                         |
|                          |                           |                            |                             |                             |
| Time 20 ms               | 239                       | 202                        | 190                         | 193                         |
| Time 50 ms               | 274                       | 206                        | 201                         | 208                         |
| Time 100 ms*             | 221                       | 183                        | 159                         | 174                         |
| Time 200 ms*             | 439                       | 331                        | 317                         | 336                         |
|                          |                           |                            |                             |                             |
| OCT class 2              | 177                       | 159                        | 149                         | 152                         |
| OCT class 3              | 264                       | 213                        | 199                         | 208                         |
| OCT class 4              | 329                       | 246                        | 235                         | 248                         |
| OCT class 5              | 473                       | 351                        | 339                         | 356                         |
| OCT class 6              | 717                       | 489                        | 489                         | 539                         |
